# Supplementary material for: Entrainment and maintenance of an internal metronome in supplementary motor area
Source: eLife journal article supplement (doi:10.7554/elife.38983), 2018-10-22
Supplement: supp [file elife-38983-supp-v1.zip]

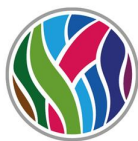

## **eLife's transparent reporting form**

We encourage authors to provide detailed information *within their submission* to facilitate the interpretation and replication of experiments. Authors can upload supporting documentation to indicate the use of appropriate reporting guidelines for health-related research (see [EQUATOR Network](#)), life science research (see the [BioSharing Information Resource](#)), or the [ARRIVE guidelines](#) for reporting work involving animal research. Where applicable, authors should refer to any relevant reporting standards documents in this form.

If you have any questions, please consult our Journal Policies and/or contact us: [editorial@elifesciences.org](mailto:editorial@elifesciences.org).

### **Sample-size estimation**

- You should state whether an appropriate sample size was computed when the study was being designed
- You should state the statistical method of sample size computation and any required assumptions
- If no explicit power analysis was used, you should describe how you decided what sample (replicate) size (number) to use

Please outline where this information can be found within the submission (e.g., sections or figure legends), or explain why this information doesn't apply to your submission:

-We recorded from 2 rhesus macaques which is the minimum acceptable number of replicates in the field of awake monkey electrophysiology. This information can be found in the Results section, page 8.

-We performed 84 and 47 recording sessions in monkeys 1 and 2, respectively. On each recording session monkeys performed 800-1100 trials. We did not perform a power analysis. The number of recording sessions is limited by a variety of experimental factors such as the dura matter integrity in the recording site. The number of trials per session is largely determined by the attention span and reward satiety of each monkey.

### **Replicates**

- You should report how often each experiment was performed
- You should include a definition of biological versus technical replication
- The data obtained should be provided and sufficient information should be provided to indicate the number of independent biological and/or technical replicates
- If you encountered any outliers, you should describe how these were handled
- Criteria for exclusion/inclusion of data should be clearly stated
- High-throughput sequence data should be uploaded before submission, with a private link for reviewers provided (these are available from both GEO and ArrayExpress)

Please outline where this information can be found within the submission (e.g., sections or figure legends), or explain why this information doesn't apply to your submission:

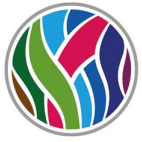

-We state the number of monkeys and recording replicates in the Results section, page 8 (biological replicates).

-In Methods section, page 37 we provide the number of technical replicates in the analysis of correct and error trials by a logistic classifier.

### Statistical reporting

- Statistical analysis methods should be described and justified
- Raw data should be presented in figures whenever informative to do so (typically when N per group is less than 10)
- For each experiment, you should identify the statistical tests used, exact values of N, definitions of center, methods of multiple test correction, and dispersion and precision measures (e.g., mean, median, SD, SEM, confidence intervals; and, for the major substantive results, a measure of effect size (e.g., Pearson's r, Cohen's d)
- Report exact p-values wherever possible alongside the summary statistics and 95% confidence intervals. These should be reported for all key questions and not only when the p-value is less than 0.05.

Please outline where this information can be found within the submission (e.g., sections or figure legends), or explain why this information doesn't apply to your submission:

-Statistical tests, central tendency (standard error) and dispersion estimates (IQR) are described in the Results (page 4) and Methods sections (page 35) of the manuscript. For convenience, at the end of this document we provide a table with each statistical test, significance, and parameters.

(For large datasets, or papers with a very large number of statistical tests, you may upload a single table file with tests, Ns, etc., with reference to sections in the manuscript.)

### Group allocation

- Indicate how samples were allocated into experimental groups (in the case of clinical studies, please specify allocation to treatment method); if randomization was used, please also state if restricted randomization was applied
- Indicate if masking was used during group allocation, data collection and/or data analysis

Please outline where this information can be found within the submission (e.g., sections or figure legends), or explain why this information doesn't apply to your submission:

We did not perform analyses by group. Data from both monkeys was pooled and analysed together. We state this in Results section, page 8, line 145.

### Additional data files ("source data")

- We encourage you to upload relevant additional data files, such as numerical data that are represented as a graph in a figure, or as a summary table
- Where provided, these should be in the most useful format, and they can be uploaded as "Source data" files linked to a main figure or table
- Include model definition files including the full list of parameters used



- Include code used for data analysis (e.g., R, MatLab)
- Avoid stating that data files are “available upon request”

Please indicate the figures or tables for which source data files have been provided:

-We made use of the Chronux Matlab toolbox for spectral analyses. We state this in the Methods section on page 36, line 671.

Statistical tests

| Description                                                                                                    | Test                                        | Parameters                                                                                                                                         | p values/Explained variance   | Location | Additional notes                                                                                          |
|----------------------------------------------------------------------------------------------------------------|---------------------------------------------|----------------------------------------------------------------------------------------------------------------------------------------------------|-------------------------------|----------|-----------------------------------------------------------------------------------------------------------|
| Regression between elapsed time and reaction time                                                              | Linear regression                           | Linear fit= $Y=A*x+B$ , Estimated parameters: A, B                                                                                                 | R squared=-.72                | Fig. 1C  |                                                                                                           |
| Comparison between pre-burst amplitude and burst amplitude                                                     | Wilcoxon paired samples test                | n=939, T=2123, Z=24.9443                                                                                                                           | p<.000001                     | Fig. 2D  |                                                                                                           |
| Regression between elapsed time and Gamma amplitude in maintenance period                                      | Non-linear regression                       | Exponential fit: $y=A*\exp(B*x)+C$ , Estimated parameters: A, B, C                                                                                 | R squared=-.8667              | Fig. 3C  |                                                                                                           |
| Chi-square tests between distributions of bursts onsets (between consecutive intervals), Distribution: 10 bins | Chi-square                                  | <a href="#">102.31</a> , <a href="#">132.36</a> , <a href="#">69.63</a> , <a href="#">181.77</a> , <a href="#">320.97</a> , <a href="#">606.78</a> | p<.001 (Bonferroni corrected) | Fig. 6B  | Chi-square values, interval duration: <a href="#">500</a> , <a href="#">750</a> , <a href="#">1000</a> ms |
| Regression between elapsed time and Gamma amplitude in entrainment period                                      | Linear regression                           | Linear fit= $Y=A*x+B$ , Estimated parameters: A, B                                                                                                 | R squared=-.94                | Fig. 6D  |                                                                                                           |
| STA Power: Interaction between condition (Baseline, Entrainment, Maintenance) and Band (Alpha, Beta, Gamma)    | Factorial ANOVA: Interaction Condition*Band | Interaction: SS=0.00029, DF=4, MS=0.000007 F=12.112                                                                                                | p<.000001                     | Fig. 8B  | See methods                                                                                               |
| Posthoc comparisons between Gamma power in entrainment and maintenance vs. Baseline                            | Repeated measure: Condition                 | Error: SS=0.00407, DF=672, MS=0.000001                                                                                                             |                               |          |                                                                                                           |
|                                                                                                                | Bonferroni test                             | Comparison: Gamma power in Maintenance vs. Baseline                                                                                                | p=.000001                     | Fig. 8B  | See methods                                                                                               |
|                                                                                                                |                                             | Comparison: Gamma power in Entrainment vs. Baseline                                                                                                | p=.037                        |          |                                                                                                           |
| Comparison between STA power at Gamma range around switch time and halfway between switch                      | t-test, dependent samples                   | n=113, t=-4.36352                                                                                                                                  | p=.000029                     | Fig. 8C  | Mean amplitude between 30-40 Hz.                                                                          |
| Comparison between STA power at Gamma range around switch time and halfway between switch ( Jittered data)     | t-test, dependent samples                   | n=113, t=-1.25                                                                                                                                     | p=.21                         | Fig. 8C  | Gray traces Fig. 8C                                                                                       |
| Coherency of Gamma power between simultaneous recording sites                                                  | Linear regression                           | Linear fit= $Y=A*x+B$ , Estimated parameters: A, B                                                                                                 | R squared=-.7284              | Fig. 8D  | See methods                                                                                               |
