# Supplementary material for: Entrainment and maintenance of an internal metronome in supplementary motor area
Source: eLife journal article supplement (doi:10.7554/elife.38983), 2018-10-22
Supplement: supp [file elife-38983-supp-v1.zip]

Archive with 15 entries (15 files):
- elife_poa_e38983_Figure_3_source_data_1.mat
- elife_poa_e38983_Figure_5_source_data_1.mat
- elife_poa_e38983_Figure_2_source_data_1.mat
- elife_poa_e38983_Figure_4_source_data_1.mat
- elife_poa_e38983_Figure_8_source_data_1.mat
- elife_poa_e38983_Transparent_Reporting_File.pdf
- elife_poa_e38983_Figure_6_source_data_1.mat
- elife_poa_e38983_Figure_1_figure_supplement_1_source_data_1.mat
- elife_poa_e38983_Figure_7_figure_supplement_1.pdf
- elife_poa_e38983_Figure_1_figure_supplement_2.pdf
- elife_poa_e38983_Figure_1_source_data_1.mat
- elife_poa_e38983_Figure_1_figure_supplement_1.pdf
- elife_poa_e38983_Figure_1_figure_supplement_2_source_data_1.mat
- elife_poa_e38983_Figure_7_figure_supplement_1_source_data_1.mat
- elife_poa_e38983_Figure_4_figure_supplement_1.pdf
