# Supplementary figures and images for: Entrainment and maintenance of an internal metronome in supplementary motor area
Source: eLife journal article supplement (doi:10.7554/elife.38983), 2018-10-22

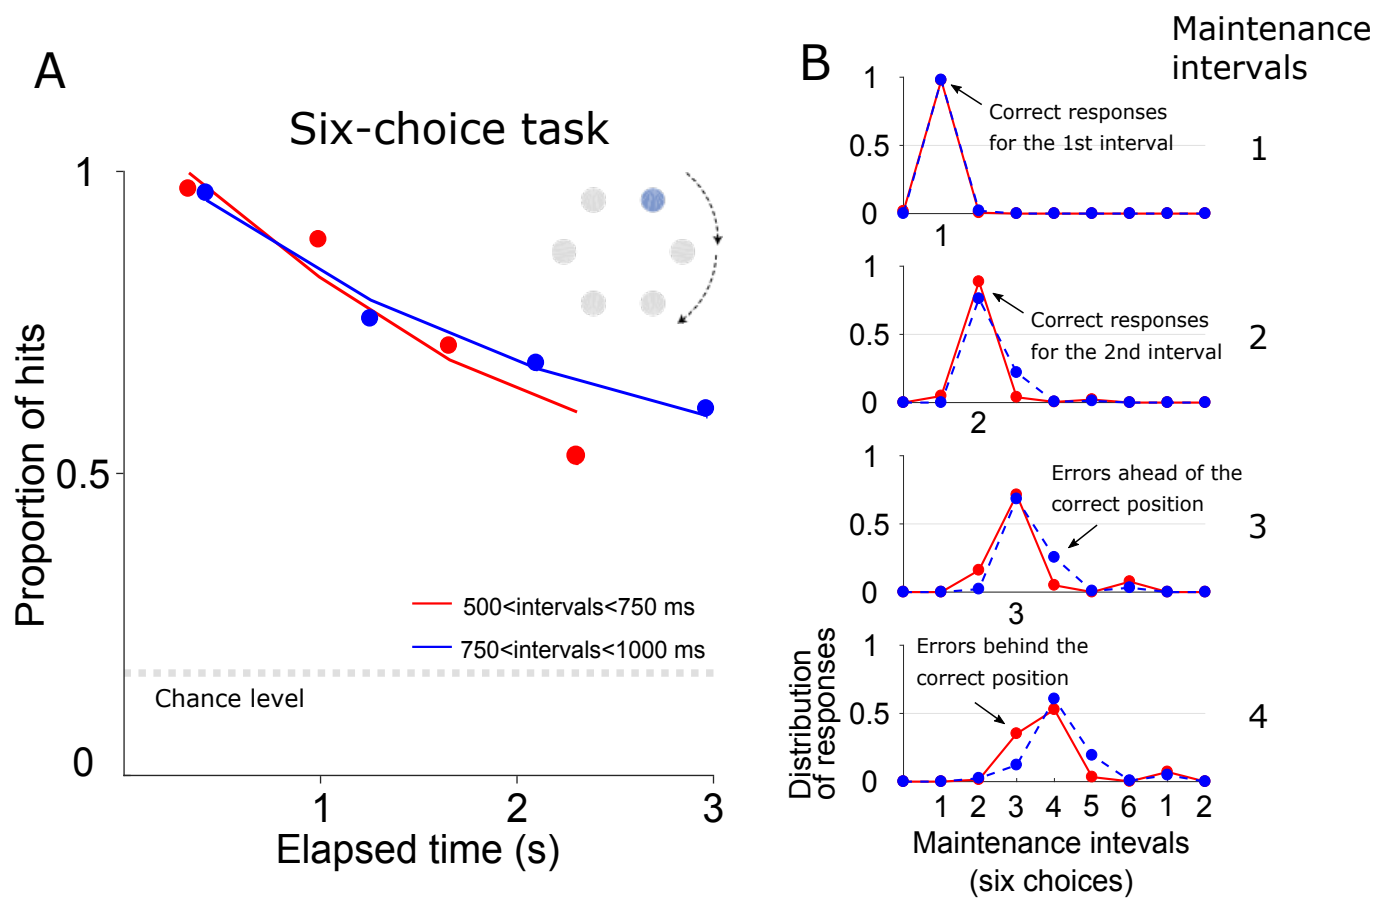

Figure 4-Supplement 1

Supplement: supp [file elife-38983-supp-v1.zip]

# A Monkey 1

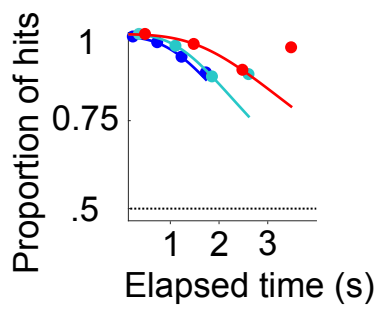

# Monkey 2

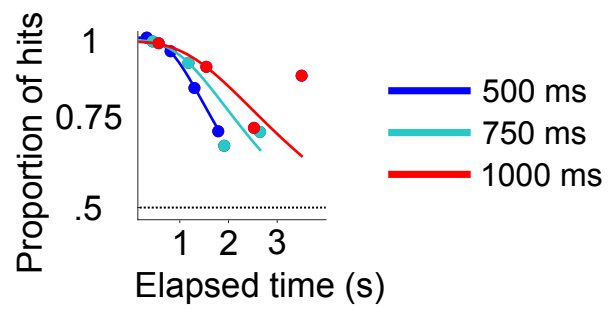

## B

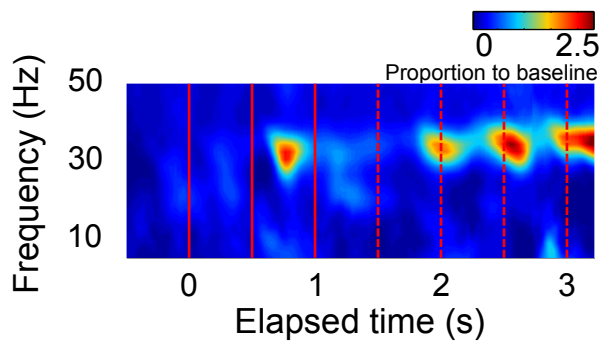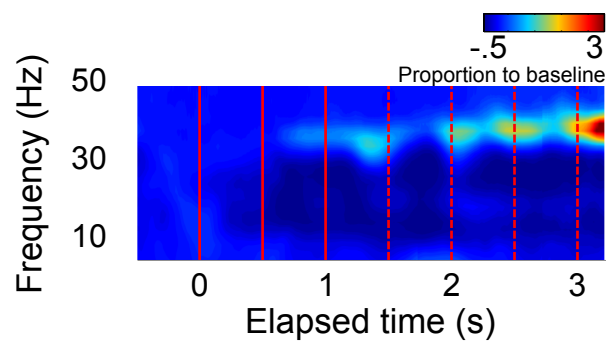

## C

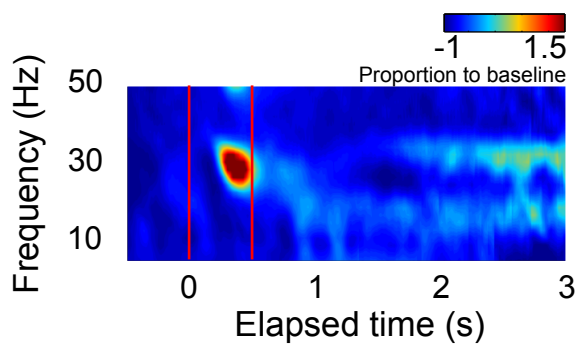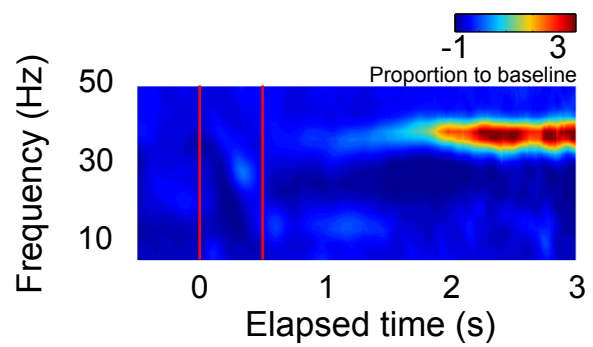

Figure 1-Supplement 1

Supplement: supp [file elife-38983-supp-v1.zip]

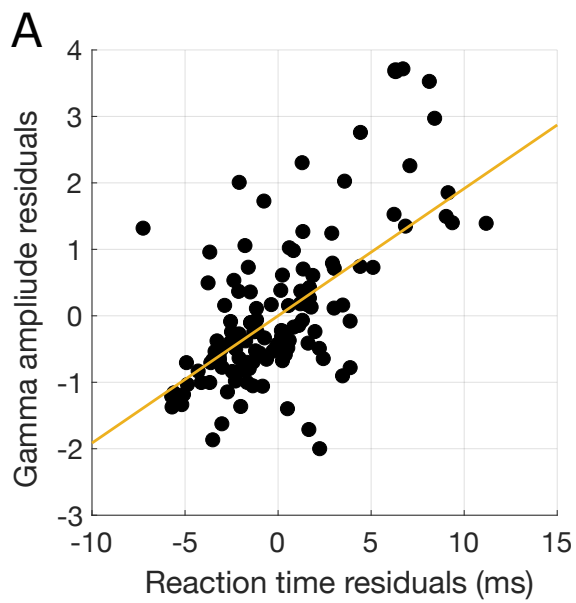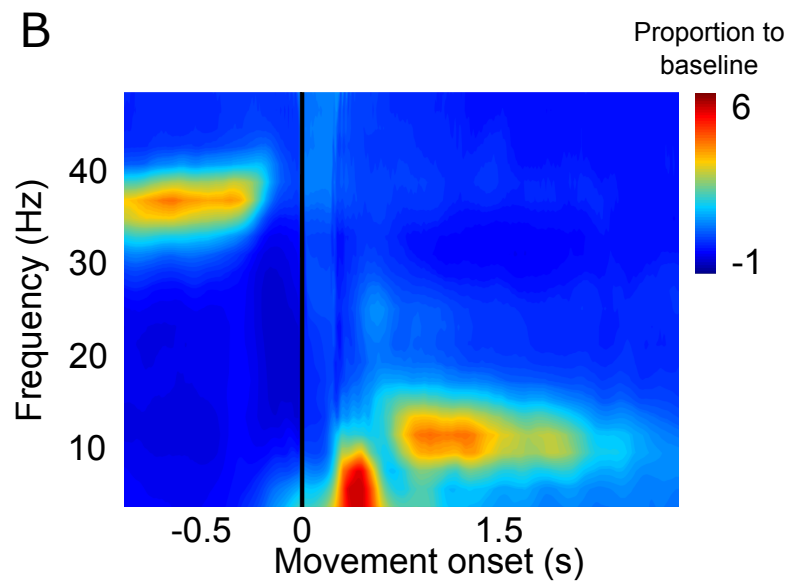

Figure 1-Supplement 2

Supplement: supp [file elife-38983-supp-v1.zip]

Entrainment Maintenance

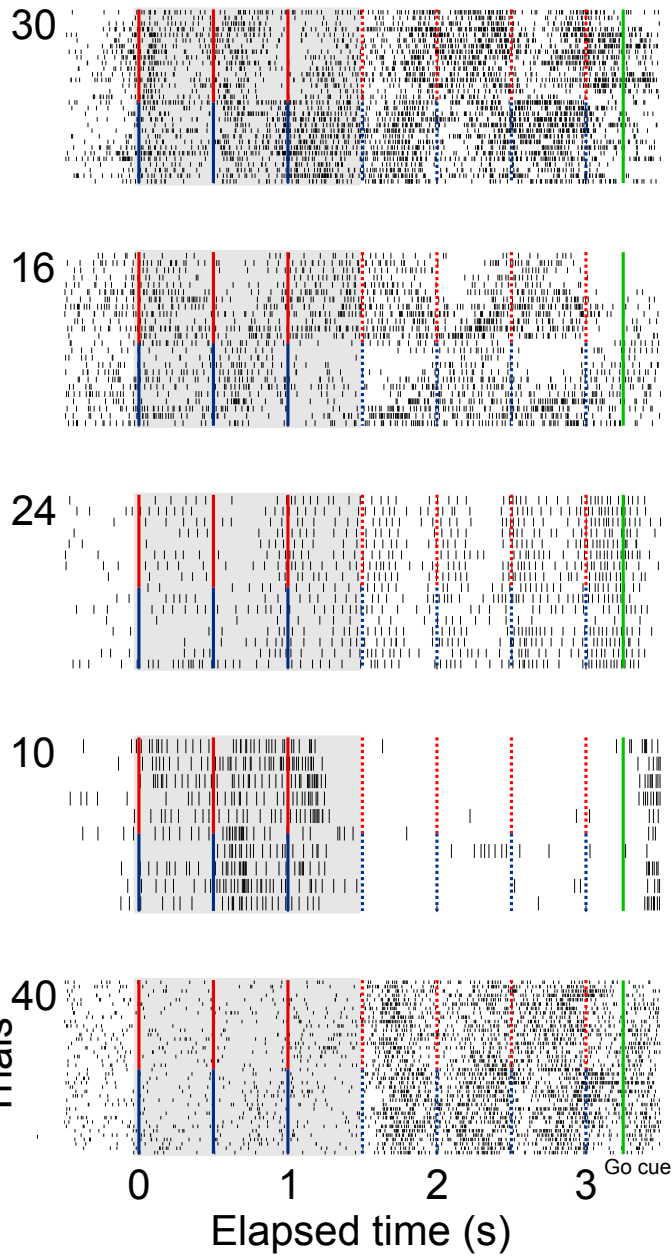

Entrainment Maintenance

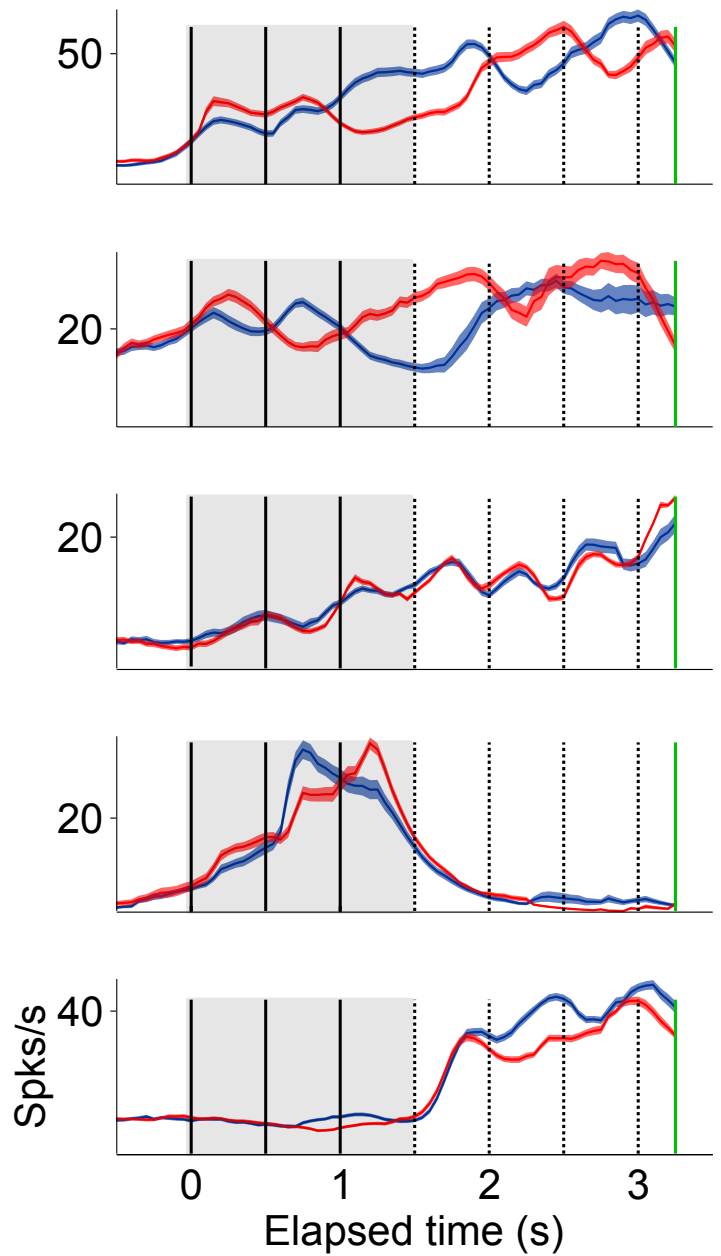

Figure 7-Supplement 1

Supplement: supp [file elife-38983-supp-v1.zip]
